# Supplementary material for: Anti-inflammatory effects of octadecylamine-functionalized nanodiamond on primary human macrophages
Source: Royal Society of Chemistry journal article supplement (doi:10.1039/c7bm00294g), 2017-01-01
Supplement: c7bm00294g1.pdf [file c7bm00294g1.pdf]

Supplementary information for:

**Anti-inflammatory effects of octadecylamine-functionalized nanodiamond on primary human macrophages**

A. E. Pentecost, C. E. Witherel, Y. Gogotsi and K. L. Spiller

**Supplementary Table 1. Gene IDs.** List of gene IDs and their corresponding accession numbers.

| Gene ID | Accession number |
|---------|------------------|
| TNF     | NM_000594        |
| IL1B    | NM_000576        |
| CCR7    | NM_001838        |
| TIMP3   | NM_000362        |
| MRC1    | NM_002438        |
| CCL22   | NM_002990        |
| CD163   | NM_004244        |
| MERTK   | NM_006343        |
| MMP7    | NM_002423        |
| VCAN    | NM_004385        |
| MMP8    | NM_002424        |
| VEGFA   | NM_001025366     |
| PDGFB   | NM_002608        |
| MMP9    | NM_004994        |
| GAPDH   | NM_001256799     |
| TFRC    | NM_003234        |
| PSMB2   | NM_002794        |
| PSMB4   | NM_002796        |
| VCP     | NM_007126        |

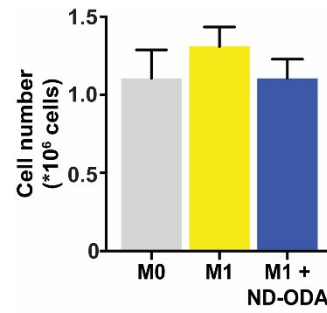

**Supplementary Figure 1. Cell count using trypan blue exclusion method to determine the number of live cells in the M0 and M1 controls and M1 with ND-ODA after 24 hours of culture in 1mL of cytokine-free media. Average cell viability for each group was >95%.**
